# Supplementary material for: Self-assembled small molecule natural product gel for drug delivery: a breakthrough in new application of small molecule natural products
Source: PubMed Central journal article supplement — Acta Pharm Sin B. 2019 Oct 6;10(5):913–27. doi: 10.1016/j.apsb.2019.09.009 (PMC7280148; doi:10.1016/j.apsb.2019.09.009), 2019-10-06
Supplement: mmc2.pdf [file mmc2.pdf]

## Supporting Information for

### Original article

# Self-assembled small molecule natural product gel for drug delivery: a breakthrough in new application of small molecule natural products

Kangkang Zhi<sup>†</sup>, Jiacheng Wang<sup>†</sup>, Haitian Zhao, Xin Yang<sup>\*</sup>

*School of Chemistry and Chemical Engineering, Harbin Institute of Technology, Harbin 150000, China*

Corresponding author. Tel.: +86 451 86403309; fax: +86 451 86403379.

E-mail address: [yangxin@hit.edu.cn](mailto:yangxin@hit.edu.cn) (Xin Yang).

<sup>††</sup>These authors made equal contributions to this work.

Received 25 June 2019; received in revised form 18 August 2019; accepted 22 September 2019

## Table of Contents

|                                                                                                                                                                                      |   |
|--------------------------------------------------------------------------------------------------------------------------------------------------------------------------------------|---|
| Supporting figures .....                                                                                                                                                             | 3 |
| <b>Figure S1</b> 2D NOESY spectra of compound <b>3</b> .....                                                                                                                         | 3 |
| <b>Figure S2</b> <sup>1</sup> H NMR spectra of compound <b>3</b> in mixed solvent of deuterated ethanol and deuterated water (4:1) at different concentrations. ....                 | 4 |
| <b>Figure S3</b> Anatomical photograph of the tumor site of mice in DOX- <b>3</b> /NPG (i.t.) and DOX-EW (i.t.) at different times after treatment (circled as the tumor site). .... | 4 |
| <b>Figure S4</b> <i>In vitro</i> antitumor activity of drug-loaded <b>3</b> /NPG and drug-GG. ....                                                                                   | 5 |
| <b>Figure S5</b> Ascites mice appearing in DOX-EW (i.t.) group. ....                                                                                                                 | 5 |
| <b>Figure S6</b> H&E staining results of tumors. Scale bars, normal 20 μm, zoom 100 μm.....                                                                                          | 6 |
| <b>Figure S7</b> TUNEL staining results of tumors (magnification 200×).....                                                                                                          | 6 |
| <b>Figure S8</b> H&E staining results of hearts. Scale bars, 100 μm. ....                                                                                                            | 7 |
| Supporting tables.....                                                                                                                                                               | 8 |
| <b>Table S1</b> Inhibitory effect of compounds <b>1–3</b> on TNF- $\alpha$ released from lipopolysaccharide-stimulated mouse macrophages (RAW264.7).....                             | 8 |
| <b>Table S2</b> Anti-inflammatory activity of compounds <b>1–3</b> on xylene-induced <i>in vivo</i> ear edema in mice .....                                                          | 8 |
| <b>Table S3</b> Quantitative analysis of fluorescence intensity of apoptotic cells stained with TUNEL...                                                                             | 8 |

## Supporting figures

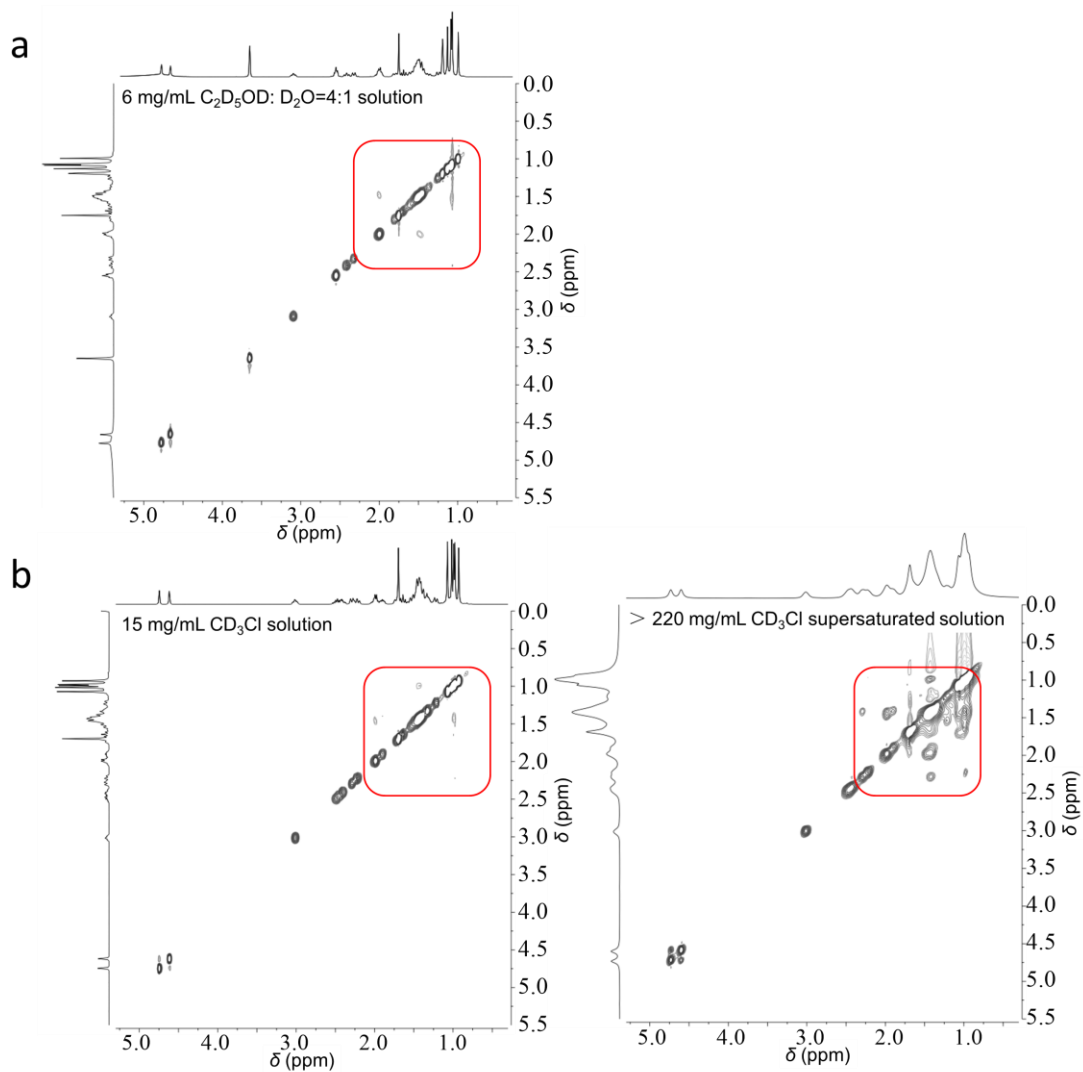

**Figure S1** 2D NOESY spectra of compound **3**. (a) Compound **3** in mixed solvent of deuterated ethanol and deuterated water (4:1) at 6 mg/mL. (b) Compound **3** in deuterated chloroform at different concentrations.

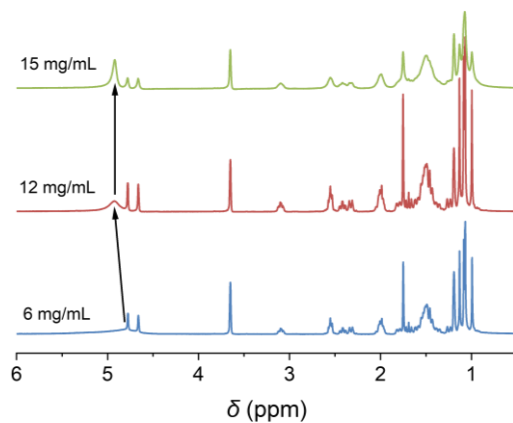

**Figure S2**  $^1\text{H}$  NMR spectra of compound **3** in mixed solvent of deuterated ethanol and deuterated water (4:1) at different concentrations.

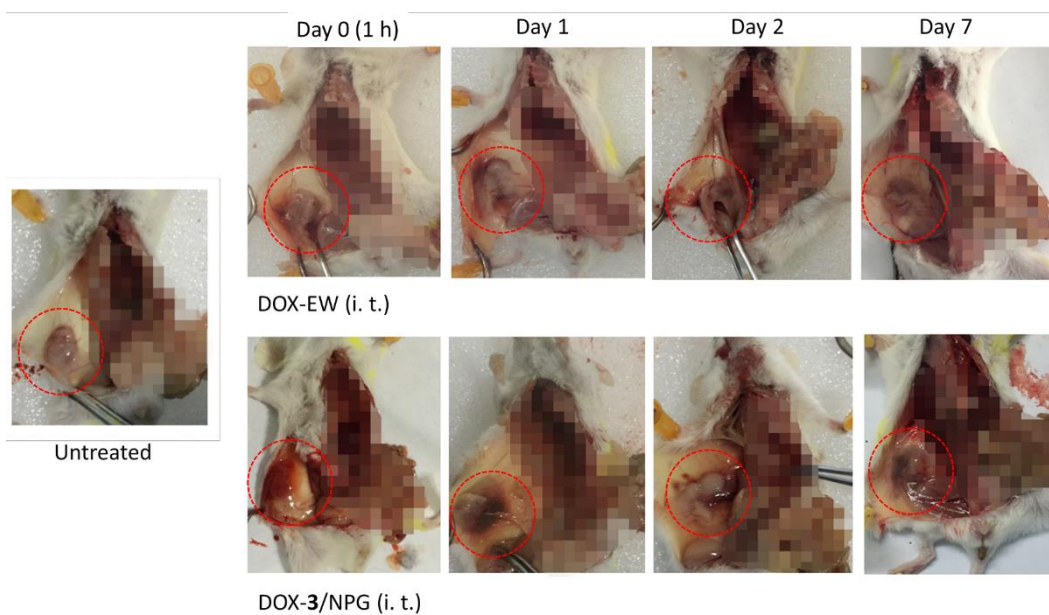

**Figure S3** Anatomical photograph of the tumor site of mice in DOX-3/NPG (i. t.) and DOX-EW (i. t.) at different times after treatment (circled as the tumor site).

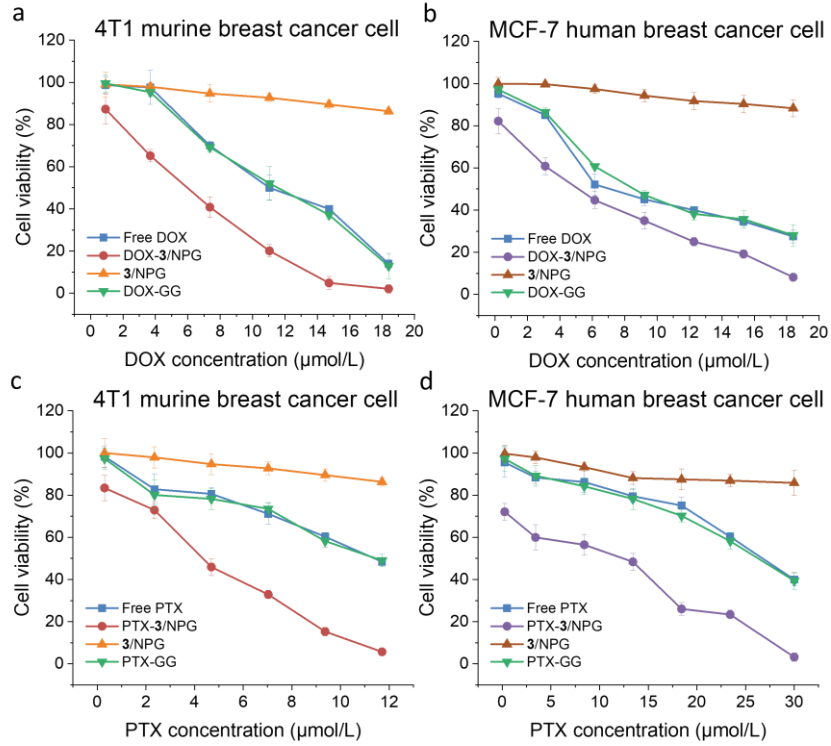

**Figure S4** *In vitro* antitumor activity of drug-loaded 3/NPG and drug-GG. (a) 4T1 cells treated with free DOX, DOX-3/NPG, 3/NPG or DOX-GG. (b) MCF-7 cells treated with free DOX, DOX-3/NPG, 3/NPG or DOX-GG. (c) 4T1 cells treated with free PTX, PTX-3/NPG, 3/NPG or PTX-GG. (d) MCF-7 cells treated with free PTX, PTX-3/NPG or 3/NPG. Data are expressed as mean  $\pm$  SD,  $n=6$ .

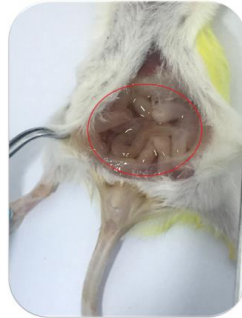

**Figure S5** Ascites mice appearing in DOX-EW (i.t.) group.

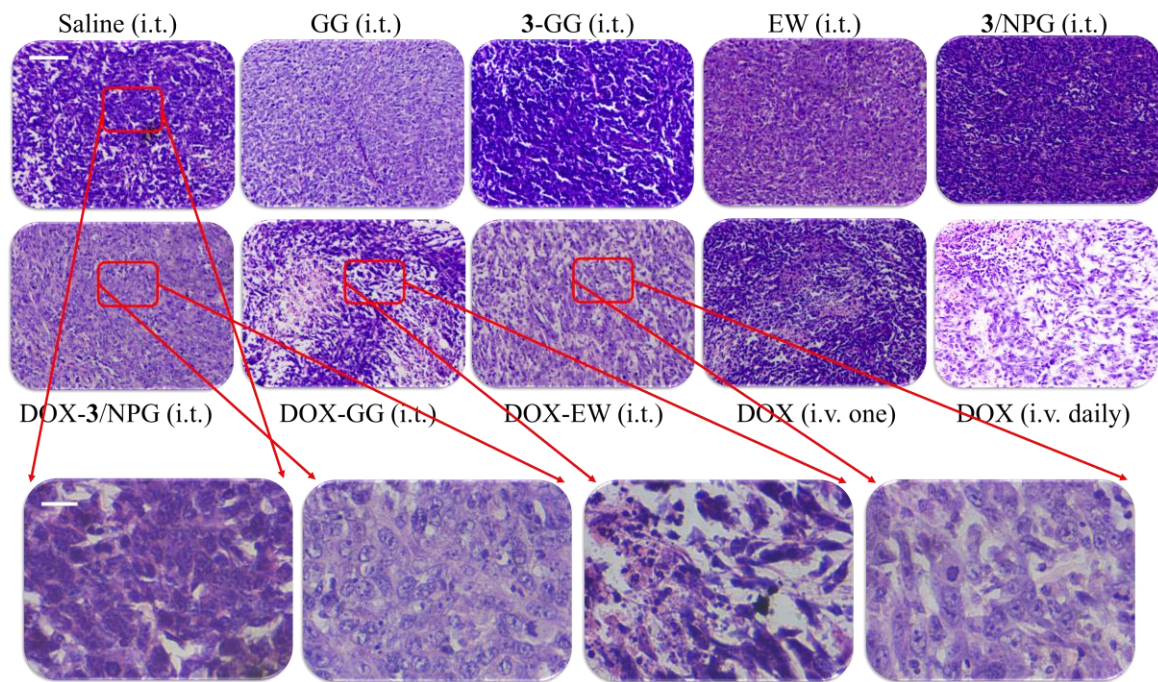

**Figure S6** H&E staining results of tumors. Scale bars, normal 20  $\mu\text{m}$ , zoom 100  $\mu\text{m}$

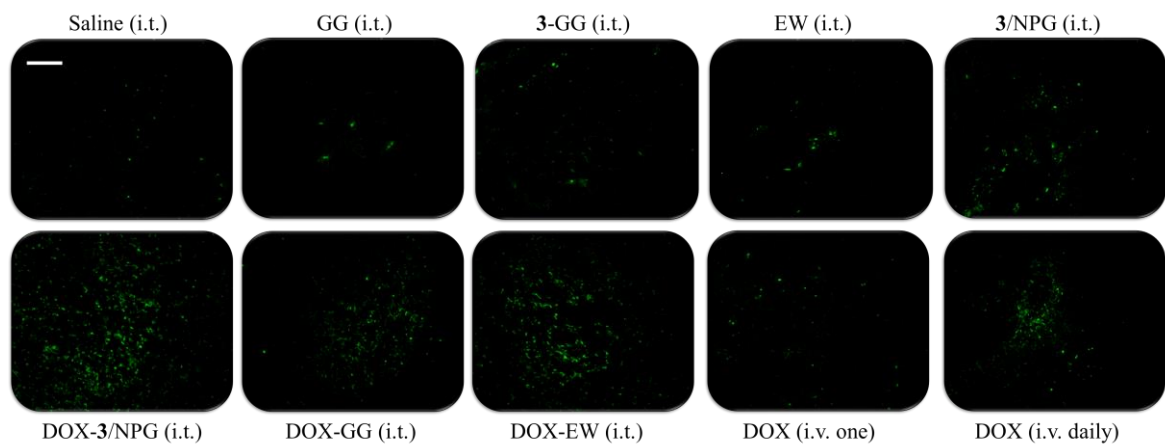

**Figure S7** TUNEL staining results of tumors (magnification 200 $\times$ ). Scale bars, 10  $\mu\text{m}$ .

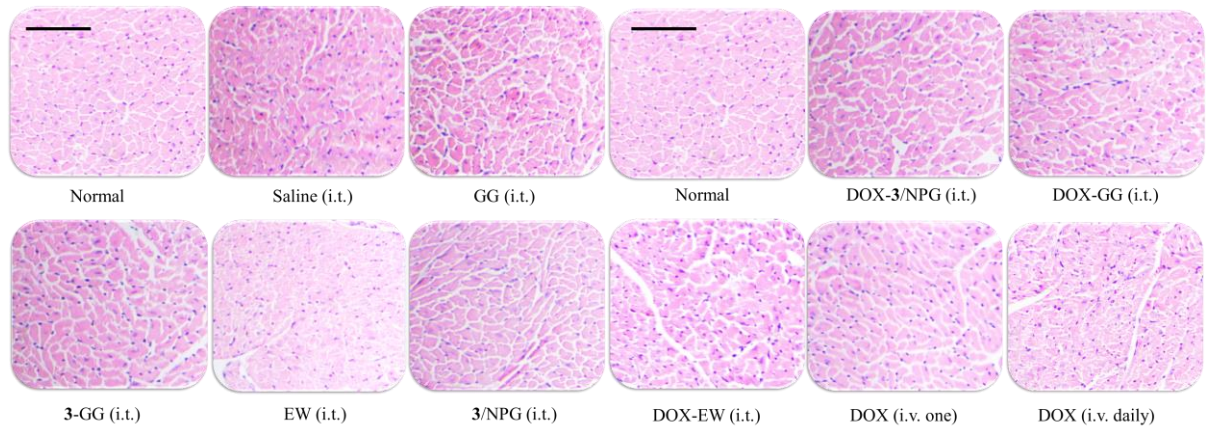

**Figure S8** H&E staining results of hearts. Scale bars, 100  $\mu$ m.



## Supporting tables

**Table S1** Inhibitory effect of compounds **1–3** on TNF- $\alpha$  released from lipopolysaccharide-stimulated mouse macrophages (RAW264.7).

| Group             | IC <sub>50</sub> ( $\mu$ mol/L) |
|-------------------|---------------------------------|
| Ibuprofen         | 43.83                           |
| Compound <b>1</b> | 160.16                          |
| Compound <b>2</b> | 366.77                          |
| Compound <b>3</b> | 84.19                           |

**Table S2** Anti-inflammatory activity of compounds **1–3** on xylene-induced *in vivo* ear edema in mice.

| Group             | Dose (mg per mouse) | Edema degree (mg)   | Inhibition rate (%) |
|-------------------|---------------------|---------------------|---------------------|
| Model             | –                   | 16.02 $\pm$ 1.37    | –                   |
| Ibuprofen         | 0.5                 | 11.90 $\pm$ 0.83*** | 25.7                |
|                   | 0.5                 | 15.01 $\pm$ 0.90    | 6.3                 |
| Compound <b>1</b> | 1.0                 | 14.51 $\pm$ 1.21*   | 9.4                 |
|                   | 2.0                 | 14.10 $\pm$ 1.25*   | 12.0                |
|                   | 0.5                 | 15.58 $\pm$ 1.41    | 2.7                 |
| Compound <b>2</b> | 1.0                 | 15.72 $\pm$ 0.56    | 1.9                 |
|                   | 2.0                 | 15.51 $\pm$ 0.87    | 3.2                 |
|                   | 0.5                 | 14.37 $\pm$ 1.60*   | 10.3                |
| Compound <b>3</b> | 1.0                 | 13.48 $\pm$ 1.72**  | 15.9                |
|                   | 2.0                 | 11.58 $\pm$ 1.22*** | 27.7                |

Values are mean  $\pm$  SD,  $n = 6$ . \* $P < 0.05$ , \*\* $P < 0.01$  and \*\*\* $P < 0.001$  when compared to model group. –Not applicable

**Table S3** Quantitative analysis of fluorescence intensity of apoptotic cells stained with TUNEL.

| Group            | Fluorescence intensity |
|------------------|------------------------|
| Saline (i.t.)    | 5,883 $\pm$ 940        |
| GG (i.t.)        | 3,435 $\pm$ 135        |
| 3-GG (i.t.)      | 8,686 $\pm$ 763        |
| EW (i.t.)        | 4,942 $\pm$ 1052       |
| 3/NPG (i.t.)     | 10,720 $\pm$ 2,036     |
| DOX-3/NPG (i.t.) | 123,039 $\pm$ 8,996    |
| DOX-GG (i.t.)    | 38,420 $\pm$ 1,390     |
| DOX-EW (i.t.)    | 71,607 $\pm$ 5,219     |
| DOX (i.v. one)   | 5,513 $\pm$ 245        |
| DOX (i.v. daily) | 22,792 $\pm$ 1,806     |

Values are mean  $\pm$  SD,  $n = 3$ .
